# Supplementary material
Source: Research Square preprint supplement (doi:10.21203/rs.3.rs-9039574/v1)
Supplement: Supplementary file 1 [file 07cb0b9b238af49f97d7128c.pdf]

## ***SUPPLEMENTARY MATERIALS***

***The differences between immersive audio and video scenarios to mediate digital mindfulness interventions: a RCT study***

## Independent Samples T-Test

Independent Samples T-Test

|                  |                       | Statistic | df   | p     |                           | Effect Size |
|------------------|-----------------------|-----------|------|-------|---------------------------|-------------|
| <b>AGE</b>       | <b>Student's t</b>    | 0.112     | 58.0 | 0.911 | Cohen's d                 | 0.0289      |
|                  | <b>Mann-Whitney U</b> | 424       |      | 0.704 | Rank biserial correlation | -0.0578     |
| <b>EDUCATION</b> | <b>Student's t</b>    | 0.449     | 58.0 | 0.655 | Cohen's d                 | 0.1159      |
|                  | <b>Mann-Whitney U</b> | 415       |      | 0.567 | Rank biserial correlation | -0.0789     |
| <b>MISS_TO</b>   | <b>Student's t</b>    | 0.225     | 58.0 | 0.823 | Cohen's d                 | 0.0580      |
|                  | <b>Mann-Whitney U</b> | 412       |      | 0.574 | Rank biserial correlation | -0.0856     |

Note.  $H_a: \mu_{\text{sperimentale}} \neq \mu_{\text{controllo}}$

## Assumptions

Normality Test (Shapiro-Wilk)

|                  | W     | p     |
|------------------|-------|-------|
| <b>AGE</b>       | 0.740 | <.001 |
| <b>EDUCATION</b> | 0.833 | <.001 |
| <b>MISS_TO</b>   | 0.967 | 0.100 |

Note. A low p-value suggests a violation of the assumption of normality

Homogeneity of Variances Test (Levene's)

|                  | F      | df | df2 | p     |
|------------------|--------|----|-----|-------|
| <b>AGE</b>       | 0.0242 | 1  | 58  | 0.877 |
| <b>EDUCATION</b> | 2.4448 | 1  | 58  | 0.123 |
| <b>MISS_TO</b>   | 0.0197 | 1  | 58  | 0.889 |

Note. A low p-value suggests a violation of the assumption of equal variances

Group Descriptives

|                  | Group               | N  | Mean  | Median | SD    | SE    |
|------------------|---------------------|----|-------|--------|-------|-------|
| <b>AGE</b>       | <b>sperimentale</b> | 30 | 27.4  | 24.0   | 10.65 | 1.944 |
|                  | <b>controllo</b>    | 30 | 27.1  | 23.0   | 10.08 | 1.841 |
| <b>EDUCATION</b> | <b>sperimentale</b> | 30 | 14.8  | 13.0   | 2.57  | 0.469 |
|                  | <b>controllo</b>    | 30 | 14.5  | 13.0   | 2.00  | 0.364 |
| <b>MISS_TO</b>   | <b>sperimentale</b> | 30 | 129.8 | 135.0  | 18.21 | 3.324 |
|                  | <b>controllo</b>    | 30 | 128.7 | 128.5  | 19.71 | 3.599 |

# Contingency Tables

## Contingency Tables

| GROUP        | SEX |    | Total |
|--------------|-----|----|-------|
|              | F   | M  |       |
| sperimentale | 23  | 7  | 30    |
| controllo    | 20  | 10 | 30    |
| Total        | 43  | 17 | 60    |

## $\chi^2$ Tests

|          | Value | df | p     |
|----------|-------|----|-------|
| $\chi^2$ | 0.739 | 1  | 0.390 |
| N        | 60    |    |       |

## Nominal

|                 | Value |
|-----------------|-------|
| Phi-coefficient | 0.111 |
| Cramer's V      | 0.111 |

## Independent Samples T-Test

Independent Samples T-Test

|                          |                       | Statistic          | df   | p     |                           | Effect Size |
|--------------------------|-----------------------|--------------------|------|-------|---------------------------|-------------|
| <b>Honesty-Humility</b>  | <b>Student's t</b>    | 0.135              | 58.0 | 0.893 | Cohen's d                 | 0.0348      |
|                          | <b>Mann-Whitney U</b> | 442                |      | 0.912 | Rank biserial correlation | -0.01778    |
| <b>Emotionality</b>      | <b>Student's t</b>    | 2.217              | 58.0 | 0.031 | Cohen's d                 | 0.5724      |
|                          | <b>Mann-Whitney U</b> | 325                |      | 0.064 | Rank biserial correlation | -0.27889    |
| <b>Extraversion</b>      | <b>Student's t</b>    | -0.506             | 58.0 | 0.614 | Cohen's d                 | -0.1308     |
|                          | <b>Mann-Whitney U</b> | 399                |      | 0.455 | Rank biserial correlation | 0.11333     |
| <b>Agreeableness</b>     | <b>Student's t</b>    | -0.771             | 58.0 | 0.444 | Cohen's d                 | -0.1992     |
|                          | <b>Mann-Whitney U</b> | 411                |      | 0.564 | Rank biserial correlation | 0.08778     |
| <b>Conscientiousness</b> | <b>Student's t</b>    | 0.327              | 58.0 | 0.745 | Cohen's d                 | 0.0843      |
|                          | <b>Mann-Whitney U</b> | 438                |      | 0.865 | Rank biserial correlation | -0.02667    |
| <b>Openness</b>          | <b>Student's t</b>    | -0.341             | 58.0 | 0.734 | Cohen's d                 | -0.0880     |
|                          | <b>Mann-Whitney U</b> | 435                |      | 0.830 | Rank biserial correlation | 0.03333     |
| <b>Altruism</b>          | <b>Student's t</b>    | 0.638 <sup>a</sup> | 58.0 | 0.526 | Cohen's d                 | 0.1649      |
|                          | <b>Mann-Whitney U</b> | 447                |      | 0.964 | Rank biserial correlation | -0.00778    |

Note.  $H_a \mu_{\text{spesimentale}} \neq \mu_{\text{controllo}}$

<sup>a</sup> Levene's test is significant ( $p < .05$ ), suggesting a violation of the assumption of equal variances

## Assumptions

Normality Test (Shapiro-Wilk)

|                          | W     | p     |
|--------------------------|-------|-------|
| <b>Honesty-Humility</b>  | 0.984 | 0.619 |
| <b>Emotionality</b>      | 0.988 | 0.802 |
| <b>Extraversion</b>      | 0.979 | 0.407 |
| <b>Agreeableness</b>     | 0.983 | 0.586 |
| <b>Conscientiousness</b> | 0.985 | 0.687 |
| <b>Openness</b>          | 0.991 | 0.926 |
| <b>Altruism</b>          | 0.951 | 0.017 |

Note. A low p-value suggests a violation of the assumption of normality

## Homogeneity of Variances Test (Levene's)

|                          | <b>F</b> | <b>df</b> | <b>df2</b> | <b>p</b> |
|--------------------------|----------|-----------|------------|----------|
| <b>Honesty-Humility</b>  | 1.887    | 1         | 58         | 0.175    |
| <b>Emotionality</b>      | 0.579    | 1         | 58         | 0.450    |
| <b>Extraversion</b>      | 2.045    | 1         | 58         | 0.158    |
| <b>Agreeableness</b>     | 0.304    | 1         | 58         | 0.583    |
| <b>Conscientiousness</b> | 0.643    | 1         | 58         | 0.426    |
| <b>Openness</b>          | 0.391    | 1         | 58         | 0.534    |
| <b>Altruism</b>          | 6.135    | 1         | 58         | 0.016    |

*Note.* A low p-value suggests a violation of the assumption of equal variances

## Group Descriptives

|                          | <b>Group</b>        | <b>N</b> | <b>Mean</b> | <b>Median</b> | <b>SD</b> | <b>SE</b> |
|--------------------------|---------------------|----------|-------------|---------------|-----------|-----------|
| <b>Honesty-Humility</b>  | <b>sperimentale</b> | 30       | 5.79        | 5.72          | 0.911     | 0.166     |
|                          | <b>controllo</b>    | 30       | 5.76        | 5.74          | 1.161     | 0.212     |
| <b>Emotionality</b>      | <b>sperimentale</b> | 30       | 5.47        | 5.61          | 0.813     | 0.148     |
|                          | <b>controllo</b>    | 30       | 4.97        | 5.09          | 0.959     | 0.175     |
| <b>Extraversion</b>      | <b>sperimentale</b> | 30       | 4.81        | 4.87          | 1.179     | 0.215     |
|                          | <b>controllo</b>    | 30       | 4.95        | 5.03          | 0.933     | 0.170     |
| <b>Agreeableness</b>     | <b>sperimentale</b> | 30       | 4.88        | 4.81          | 0.811     | 0.148     |
|                          | <b>controllo</b>    | 30       | 5.05        | 4.91          | 0.878     | 0.160     |
| <b>Conscientiousness</b> | <b>sperimentale</b> | 30       | 5.53        | 5.55          | 0.782     | 0.143     |
|                          | <b>controllo</b>    | 30       | 5.46        | 5.46          | 0.964     | 0.176     |
| <b>Openness</b>          | <b>sperimentale</b> | 30       | 5.11        | 5.10          | 0.815     | 0.149     |
|                          | <b>controllo</b>    | 30       | 5.18        | 5.18          | 0.727     | 0.133     |
| <b>Altruism</b>          | <b>sperimentale</b> | 30       | 5.61        | 5.66          | 0.654     | 0.119     |
|                          | <b>controllo</b>    | 30       | 5.46        | 5.66          | 1.035     | 0.189     |

## Independent Samples T-Test

Independent Samples T-Test

|                 |                       | Statistic | df   | p     |                           | Effect Size |
|-----------------|-----------------------|-----------|------|-------|---------------------------|-------------|
| <b>d_MAAS</b>   | <b>Student's t</b>    | 1.514     | 58.0 | 0.135 | Cohen's d                 | 0.391       |
|                 | <b>Mann-Whitney U</b> | 390       |      | 0.375 | Rank biserial correlation | -0.1344     |
| <b>d_SPANE</b>  | <b>Student's t</b>    | 2.326     | 58.0 | 0.024 | Cohen's d                 | 0.601       |
|                 | <b>Mann-Whitney U</b> | 260       |      | 0.005 | Rank biserial correlation | -0.4233     |
| <b>d_MHC_SF</b> | <b>Student's t</b>    | 2.050     | 58.0 | 0.045 | Cohen's d                 | 0.529       |
|                 | <b>Mann-Whitney U</b> | 317       |      | 0.050 | Rank biserial correlation | -0.2956     |
| <b>d_PSS10</b>  | <b>Student's t</b>    | -0.411    | 58.0 | 0.683 | Cohen's d                 | -0.106      |
|                 | <b>Mann-Whitney U</b> | 400       |      | 0.458 | Rank biserial correlation | 0.1122      |
| <b>d_STAI-s</b> | <b>Student's t</b>    | -0.551    | 58.0 | 0.584 | Cohen's d                 | -0.142      |
|                 | <b>Mann-Whitney U</b> | 407       |      | 0.529 | Rank biserial correlation | 0.0956      |
| <b>d_BDI</b>    | <b>Student's t</b>    | -1.532    | 58.0 | 0.131 | Cohen's d                 | -0.396      |
|                 | <b>Mann-Whitney U</b> | 374       |      | 0.263 | Rank biserial correlation | 0.1689      |
| <b>d_STAI_t</b> | <b>Student's t</b>    | -1.729    | 58.0 | 0.089 | Cohen's d                 | -0.446      |
|                 | <b>Mann-Whitney U</b> | 354       |      | 0.157 | Rank biserial correlation | 0.2133      |
| <b>d_WHO5</b>   | <b>Student's t</b>    | 1.763     | 58.0 | 0.083 | Cohen's d                 | 0.455       |
|                 | <b>Mann-Whitney U</b> | 356       |      | 0.165 | Rank biserial correlation | -0.2089     |

Note.  $H_a: \mu_{\text{sperimentale}} \neq \mu_{\text{controllo}}$

## Assumptions

Normality Test (Shapiro-Wilk)

|                 | W     | p     |
|-----------------|-------|-------|
| <b>d_MAAS</b>   | 0.969 | 0.133 |
| <b>d_SPANE</b>  | 0.936 | 0.003 |
| <b>d_MHC_SF</b> | 0.989 | 0.849 |
| <b>d_PSS10</b>  | 0.973 | 0.197 |
| <b>d_STAI-s</b> | 0.959 | 0.043 |
| <b>d_BDI</b>    | 0.960 | 0.047 |
| <b>d_STAI_t</b> | 0.880 | <.001 |
| <b>d_WHO5</b>   | 0.976 | 0.291 |

Note. A low p-value suggests a violation of the assumption of normality

## Homogeneity of Variances Test (Levene's)

|                 | <b>F</b> | <b>df</b> | <b>df2</b> | <b>p</b> |
|-----------------|----------|-----------|------------|----------|
| <b>d_MAAS</b>   | 1.7318   | 1         | 58         | 0.193    |
| <b>d_SPANE</b>  | 1.4877   | 1         | 58         | 0.228    |
| <b>d_MHC_SF</b> | 2.2664   | 1         | 58         | 0.138    |
| <b>d_PSS10</b>  | 1.0635   | 1         | 58         | 0.307    |
| <b>d_STAI-s</b> | 0.0250   | 1         | 58         | 0.875    |
| <b>d_BDI</b>    | 1.8630   | 1         | 58         | 0.178    |
| <b>d_STAI_t</b> | 2.9726   | 1         | 58         | 0.090    |
| <b>d_WHO5</b>   | 1.0473   | 1         | 58         | 0.310    |

*Note.* A low p-value suggests a violation of the assumption of equal variances

## Group Descriptives

|                 | <b>Group</b>        | <b>N</b> | <b>Mean</b> | <b>Median</b> | <b>SD</b> | <b>SE</b> |
|-----------------|---------------------|----------|-------------|---------------|-----------|-----------|
| <b>d_MAAS</b>   | <b>sperimentale</b> | 30       | 0.124       | 0.0650        | 0.625     | 0.114     |
|                 | <b>controllo</b>    | 30       | -0.0893     | 0.100         | 0.455     | 0.0832    |
| <b>d_SPANE</b>  | <b>sperimentale</b> | 30       | 4.333       | 5.0000        | 6.572     | 1.200     |
|                 | <b>controllo</b>    | 30       | 1.0000      | 1.000         | 4.291     | 0.7834    |
| <b>d_MHC_SF</b> | <b>sperimentale</b> | 30       | 5.200       | 6.5000        | 8.401     | 1.534     |
|                 | <b>controllo</b>    | 30       | 1.4000      | 1.500         | 5.703     | 1.0412    |
| <b>d_PSS10</b>  | <b>sperimentale</b> | 30       | -1.867      | -2.0000       | 5.277     | 0.963     |
|                 | <b>controllo</b>    | 30       | -1.3667     | -1.000        | 4.072     | 0.7435    |
| <b>d_STAI-s</b> | <b>sperimentale</b> | 30       | -7.300      | -4.5000       | 9.795     | 1.788     |
|                 | <b>controllo</b>    | 30       | -5.9000     | -5.500        | 9.876     | 1.8032    |
| <b>d_BDI</b>    | <b>sperimentale</b> | 30       | -5.933      | -5.0000       | 6.581     | 1.201     |
|                 | <b>controllo</b>    | 30       | -3.6333     | -3.000        | 4.930     | 0.9002    |
| <b>d_STAI_t</b> | <b>sperimentale</b> | 30       | -5.000      | -4.0000       | 7.799     | 1.424     |
|                 | <b>controllo</b>    | 30       | -2.2333     | -2.000        | 3.997     | 0.7298    |
| <b>d_WHO5</b>   | <b>sperimentale</b> | 30       | 2.767       | 2.0000        | 4.539     | 0.829     |
|                 | <b>controllo</b>    | 30       | 0.8667      | 1.000         | 3.776     | 0.6894    |

## Descriptives

Descriptives

|                           | GROUP               | d_SPANE | d_MHC_SF | d_PSS10 | d_STAI-s | d_MAAS  | d_WHO5 | d_STAI_t | d_BDI |
|---------------------------|---------------------|---------|----------|---------|----------|---------|--------|----------|-------|
| <b>N</b>                  | <b>sperimentale</b> | 30      | 30       | 30      | 30       | 30      | 30     | 30       | 30    |
|                           | <b>controllo</b>    | 30      | 30       | 30      | 30       | 30      | 30     | 30       | 30    |
| <b>Missing</b>            | <b>sperimentale</b> | 0       | 0        | 0       | 0        | 0       | 0      | 0        | 0     |
|                           | <b>controllo</b>    | 0       | 0        | 0       | 0        | 0       | 0      | 0        | 0     |
| <b>Mean</b>               | <b>sperimentale</b> | 4.33    | 5.20     | -1.87   | -7.30    | 0.124   | 2.77   | -5.00    | -5.93 |
|                           | <b>controllo</b>    | 1.00    | 1.40     | -1.37   | -5.90    | -0.0893 | 0.867  | -2.23    | -3.63 |
| <b>Median</b>             | <b>sperimentale</b> | 5.00    | 6.50     | -2.00   | -4.50    | 0.0650  | 2.00   | -4.00    | -5.00 |
|                           | <b>controllo</b>    | 1.00    | 1.50     | -1.00   | -5.50    | 0.100   | 1.00   | -2.00    | -3.00 |
| <b>Standard deviation</b> | <b>sperimentale</b> | 6.57    | 8.40     | 5.28    | 9.79     | 0.625   | 4.54   | 7.80     | 6.58  |
|                           | <b>controllo</b>    | 4.29    | 5.70     | 4.07    | 9.88     | 0.455   | 3.78   | 4.00     | 4.93  |
| <b>Minimum</b>            | <b>sperimentale</b> | -18     | -14      | -10     | -33      | -0.870  | -7     | -34      | -24   |
|                           | <b>controllo</b>    | -8      | -10      | -10     | -36      | -1.20   | -9     | -11      | -14   |
| <b>Maximum</b>            | <b>sperimentale</b> | 17      | 22       | 14      | 11       | 1.40    | 12     | 7        | 4     |
|                           | <b>controllo</b>    | 9       | 12       | 7       | 11       | 0.530   | 8      | 4        | 11    |

## Plots

d\_SPANE

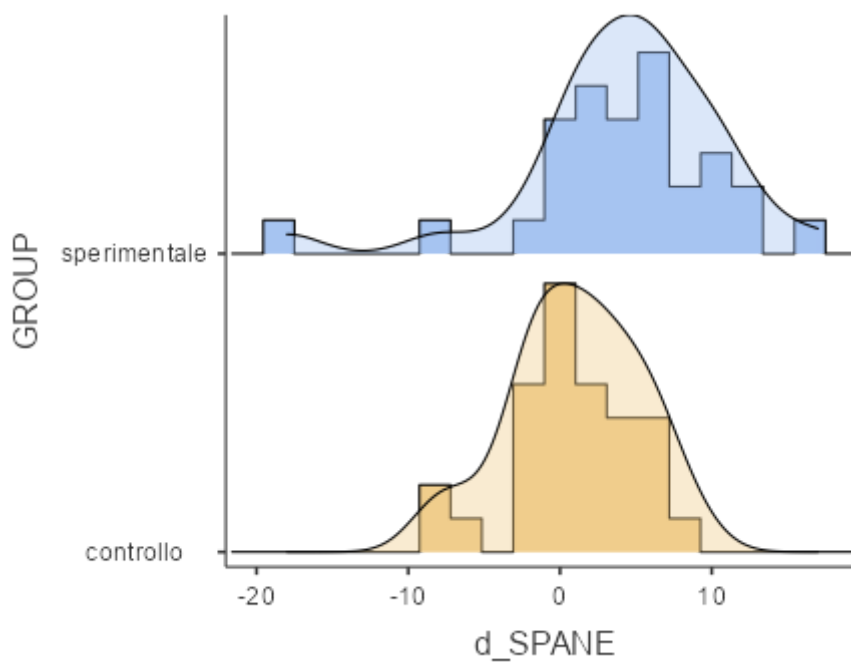

**d\_MHC\_SF**

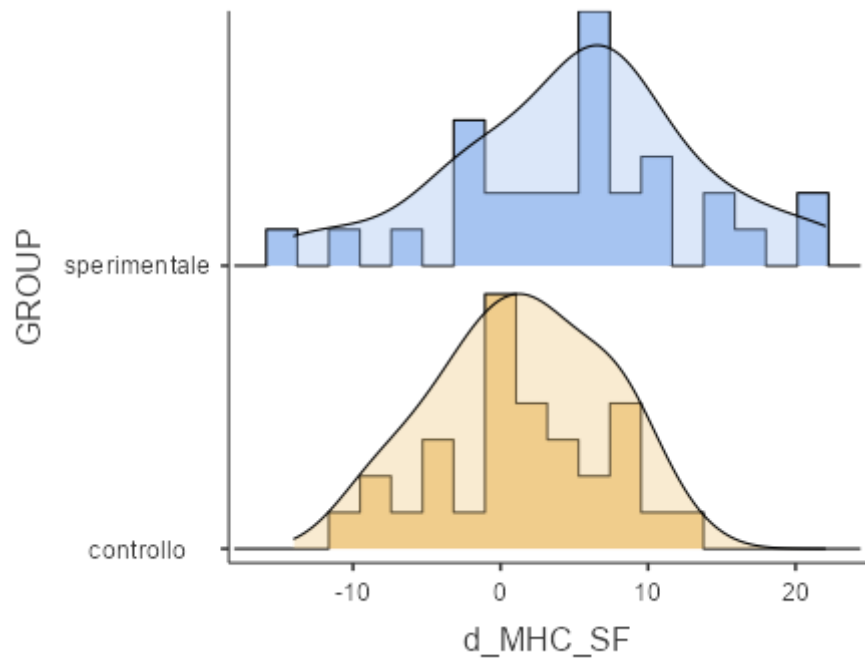

**d\_PSS10**

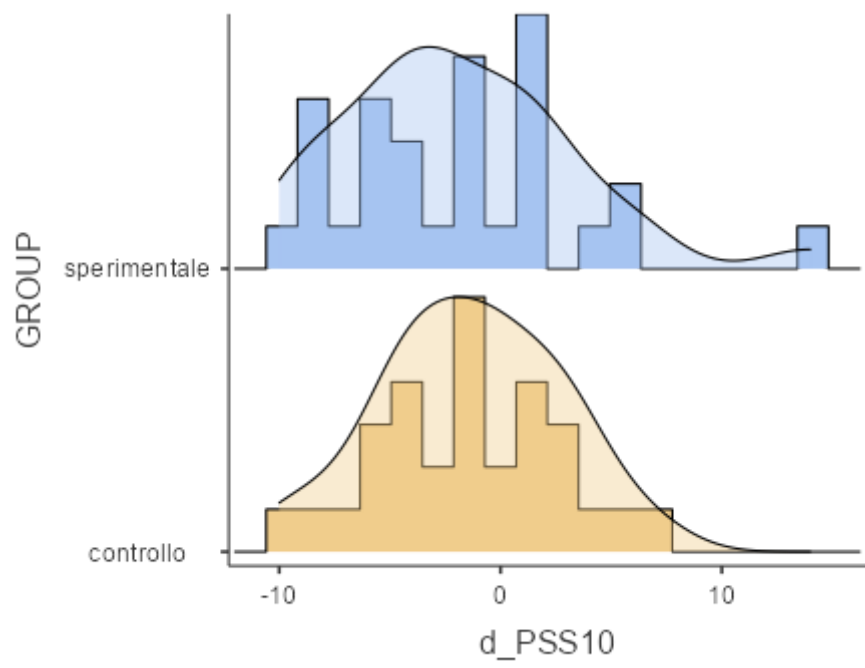

**d\_STAI-s**

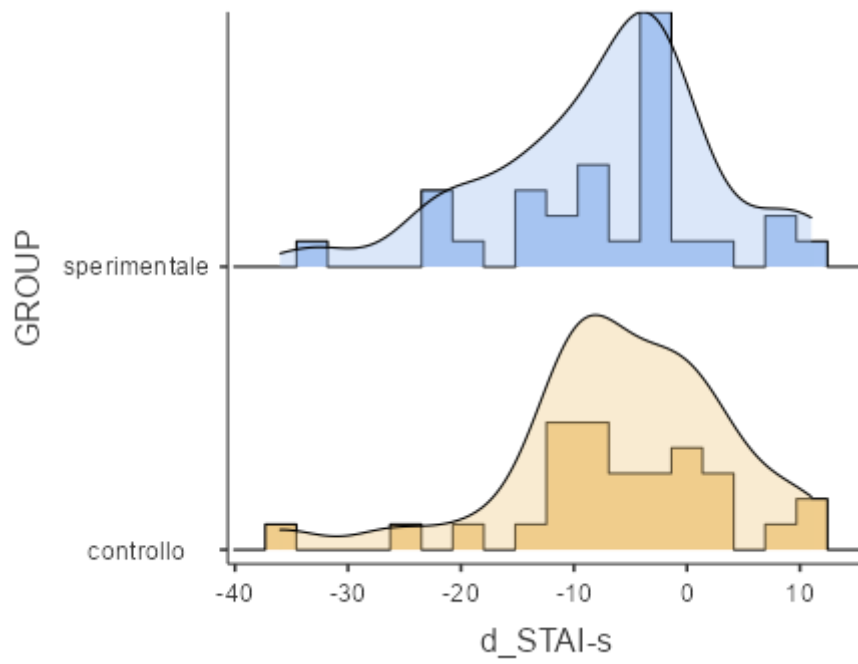

### d\_MAAS

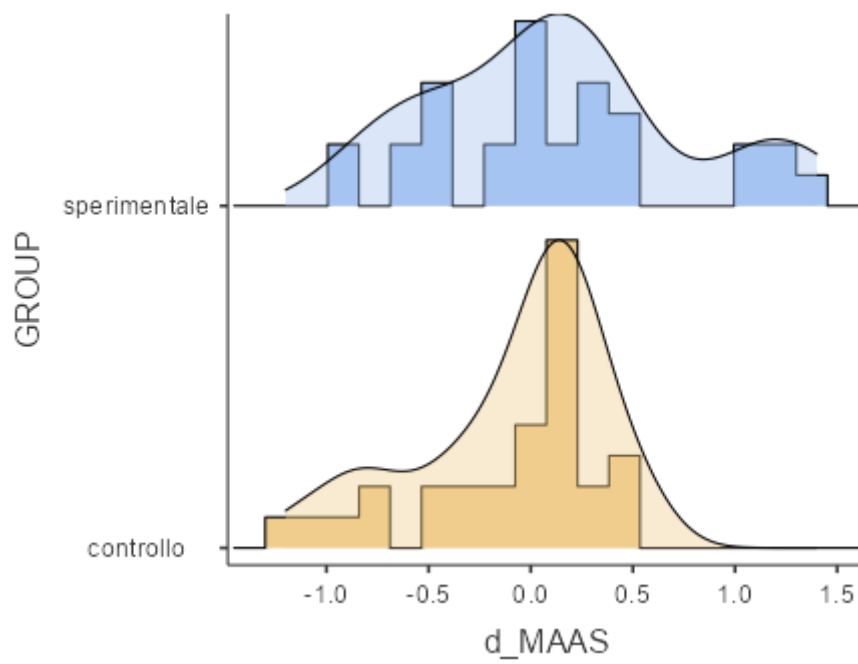

### d\_WHOS

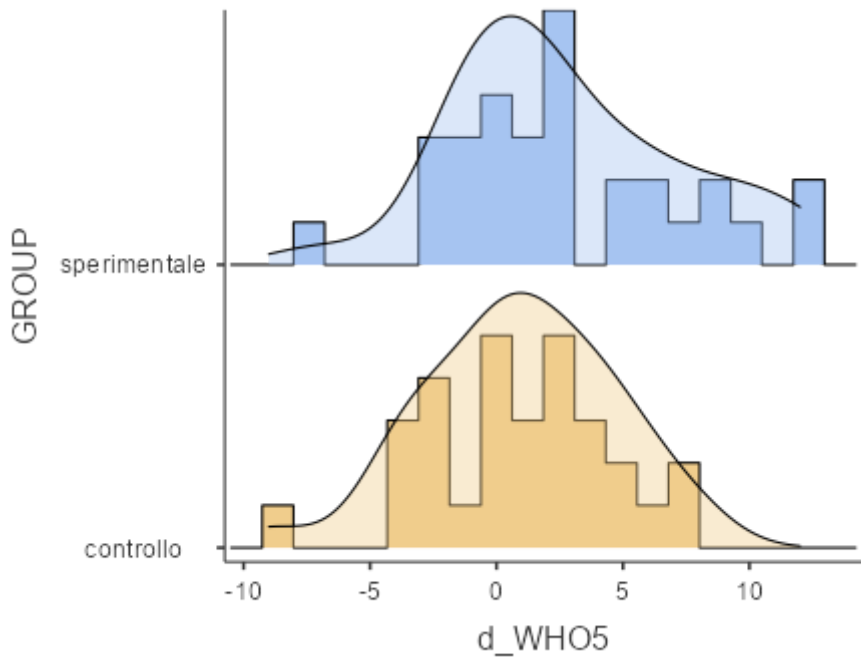

**d\_STAI\_t**

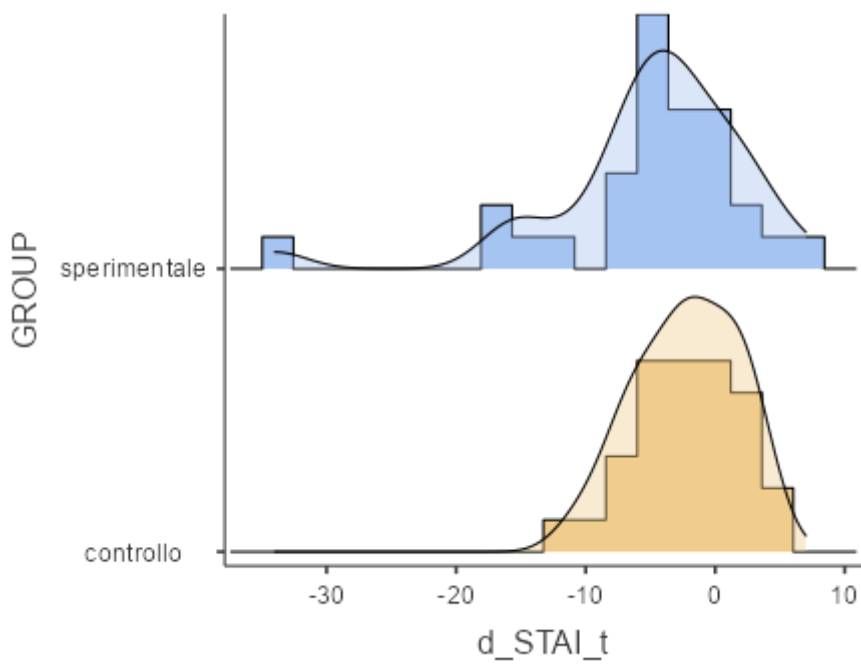

**d\_BDI**

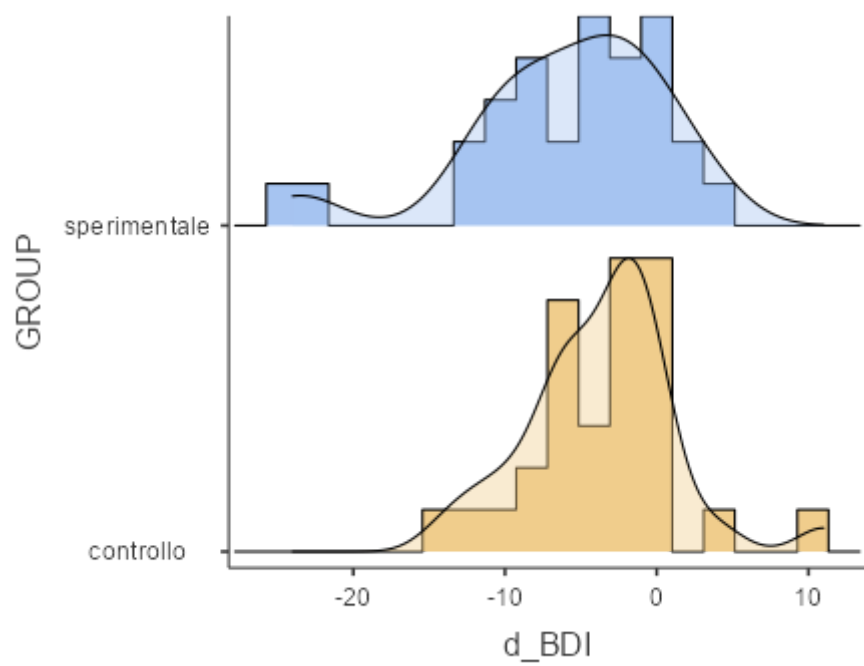

## Linear Regression

### Model Fit Measures

| Model | R     | R <sup>2</sup> |
|-------|-------|----------------|
| 1     | 0.285 | 0.0813         |

Note. Models estimated using sample size of N=60

### Model Coefficients - d\_MHC\_SF

| Predictor                                   | Estimate | SE   | t      | p     | Stand. Estimate |
|---------------------------------------------|----------|------|--------|-------|-----------------|
| Intercept <sup>a</sup>                      | 5.265    | 1.39 | 3.789  | <.001 |                 |
| GROUP:                                      |          |      |        |       |                 |
| controllo – sperimentale                    | -3.542   | 1.95 | -1.814 | 0.075 | -0.4805         |
| emotionality_c                              | -0.255   | 1.66 | -0.154 | 0.878 | -0.0318         |
| emotionality_c * GROUP:                     |          |      |        |       |                 |
| emotionality_c * (controllo – sperimentale) | 1.525    | 2.17 | 0.702  | 0.486 | 0.1898          |

<sup>a</sup> Represents reference level

## Assumption Checks

### Collinearity Statistics

|                               | VIF  | Tolerance |
|-------------------------------|------|-----------|
| <b>GROUP</b>                  | 1.09 | 0.920     |
| <b>emotionality_c</b>         | 2.59 | 0.386     |
| <b>emotionality_c * GROUP</b> | 2.48 | 0.404     |

## Linear Regression

### Model Fit Measures

| Model | R     | R <sup>2</sup> |
|-------|-------|----------------|
| 1     | 0.335 | 0.112          |

Note. Models estimated using sample size of N=60

### Model Coefficients - d\_SPANE

| Predictor                                   | Estimate | SE   | t      | p     | Stand. Estimate |
|---------------------------------------------|----------|------|--------|-------|-----------------|
| Intercept <sup>a</sup>                      | 4.492    | 1.07 | 4.213  | <.001 |                 |
| emotionality_c                              | -0.623   | 1.27 | -0.490 | 0.626 | -0.0994         |
| GROUP:                                      |          |      |        |       |                 |
| controllo – sperimentale                    | -3.161   | 1.50 | -2.110 | 0.039 | -0.5493         |
| emotionality_c * GROUP:                     |          |      |        |       |                 |
| emotionality_c * (controllo – sperimentale) | 1.925    | 1.67 | 1.155  | 0.253 | 0.3071          |

<sup>a</sup> Represents reference level

## Assumption Checks

### Collinearity Statistics

|                               | VIF  | Tolerance |
|-------------------------------|------|-----------|
| <b>emotionality_c</b>         | 2.59 | 0.386     |
| <b>GROUP</b>                  | 1.09 | 0.920     |
| <b>emotionality_c * GROUP</b> | 2.48 | 0.404     |

### *Analysis of interaction*

To further account for baseline differences in emotionality, linear regression models were conducted with changes in positive affect ( $\Delta$ SPANE) and emotional well-being ( $\Delta$ MHC-SF) as dependent variables. In both models, group (experimental vs. control), mean-centered baseline emotionality, and their interaction term were entered as predictors. The model predicting change in positive affect (SPANE) explained 11.2% of the variance,  $R^2 = 0.112$ . The effect of the group was not statistically significant,  $p = 0.143$ , although the direction of the effect indicated greater improvements in the experimental group compared to the control group. Baseline emotionality and the interaction between emotionality and group were not significant predictors, indicating that changes in positive affect were independent of initial levels of emotionality. Similarly, the model predicting change in emotional well-being (MHC\_SF) explained 8.1% of the variance,  $R^2 = 0.081$ . The effect of the group did not reach statistical significance,  $p = 0.075$ , and neither baseline emotionality nor its interaction with the group emerged as significant predictors. These results indicate that improvements in emotional well-being were not influenced by baseline emotionality and that the effects of the intervention were consistent across different levels of this personality trait (see supplementary materials “Linear Regression (emotionality)”).
